# Supplementary material for: Endothelial Dysfunction May Link Interatrial Septal Abnormalities and MTHFR-Inherited Defects to Cryptogenic Stroke Predisposition
Source: MDPI journal article supplement (doi:10.3390/biom10060861), 2020-06-04
Supplement: s1 [file s1]

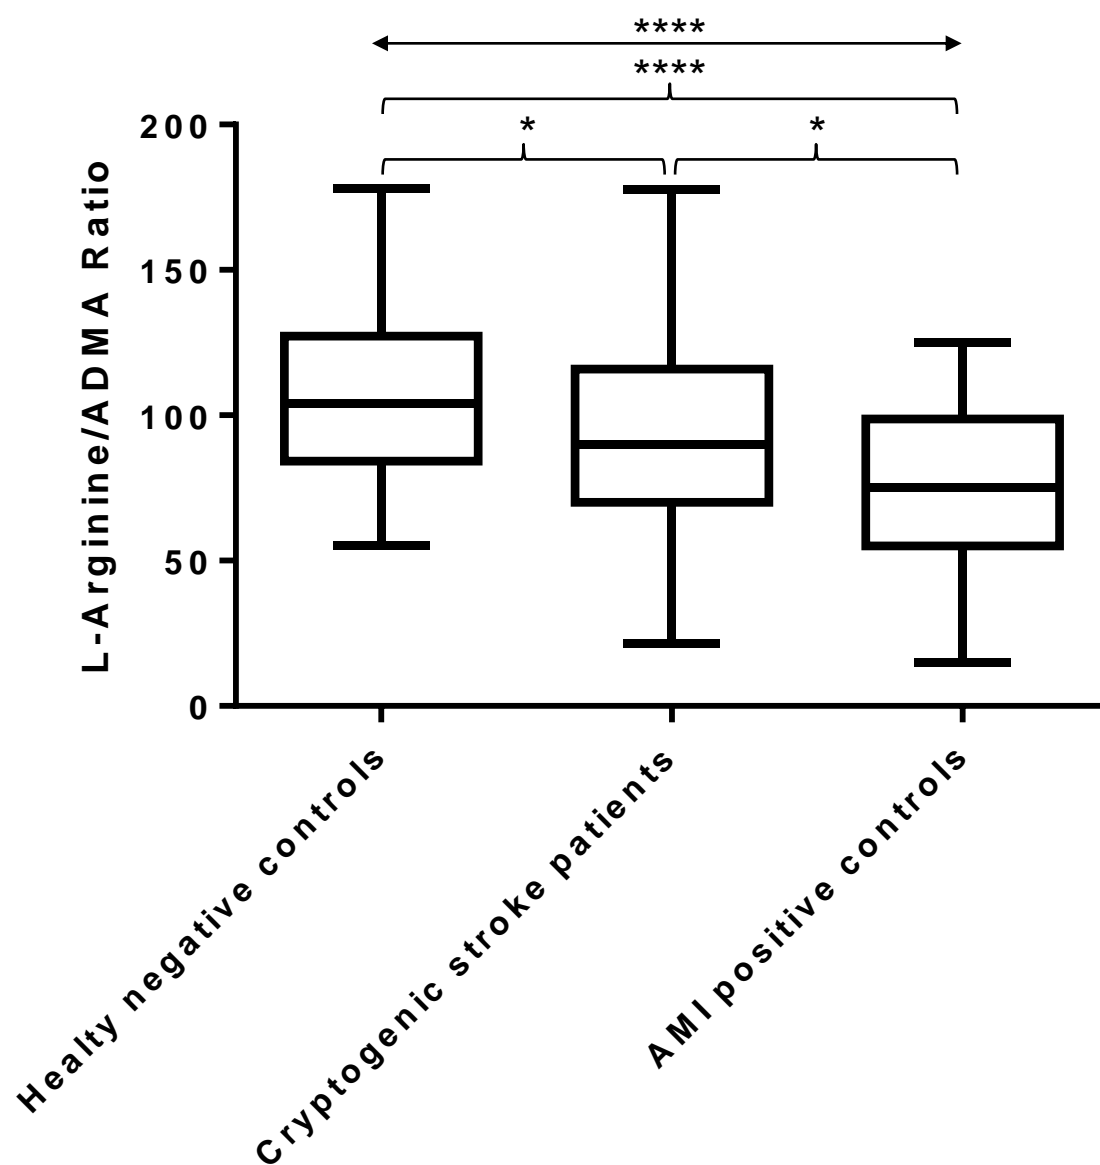

**Suppl. Figure 1.** L-Arg/ADMA ratios across healthy volunteers (negative controls, n=48), cryptogenic stroke patients (n=57) and acute myocardial infarction patients (AMI, positive controls, n=48). Box plots indicate the median, maximum and minimum value. P value across groups (double arrow line) was calculated by Kruskal-Wallis non parametric test of one-way ANOVA data. P value between groups (curly brackets) was calculated by Dunn's multiple correction.

\*  $p \leq 0.05$ ; \*\*\*\*  $p \leq 0.0001$
